# Supplementary material for: Theoretical study of the nitrogen reduction reaction catalyzed by a B-doped MoO2 six-membered ring
Source: Royal Society of Chemistry journal article supplement (doi:10.1039/d3cp05342c), 2024-01-01
Supplement: d3cp05342c1.pdf [file d3cp05342c1.pdf]

# Theoretical study of the nitrogen reduction reaction catalyzed by B-doped MoO<sub>2</sub> six-membered ring

Shaona Chen,<sup>a,b</sup> Demiao Fang,<sup>b</sup> Zhangyu Zhou,<sup>b</sup> Zhongxu Dai\*<sup>b</sup> and Jinjin Shi\*<sup>a</sup>

<sup>a</sup>School of Transportation, Fujian University of technology, No3 Xueyuan Road, 350000 Fuzhou City, Fujian, China. E-mail: shijinjinhit@sina.com.

<sup>b</sup>College of Materials and Chemical Engineering, Key laboratory of inorganic nonmetallic crystalline and energy conversion materials China Three Gorges University, Yichang, Hubei 443002, China. E-mail: Daizx@ctgu.edu.cn.

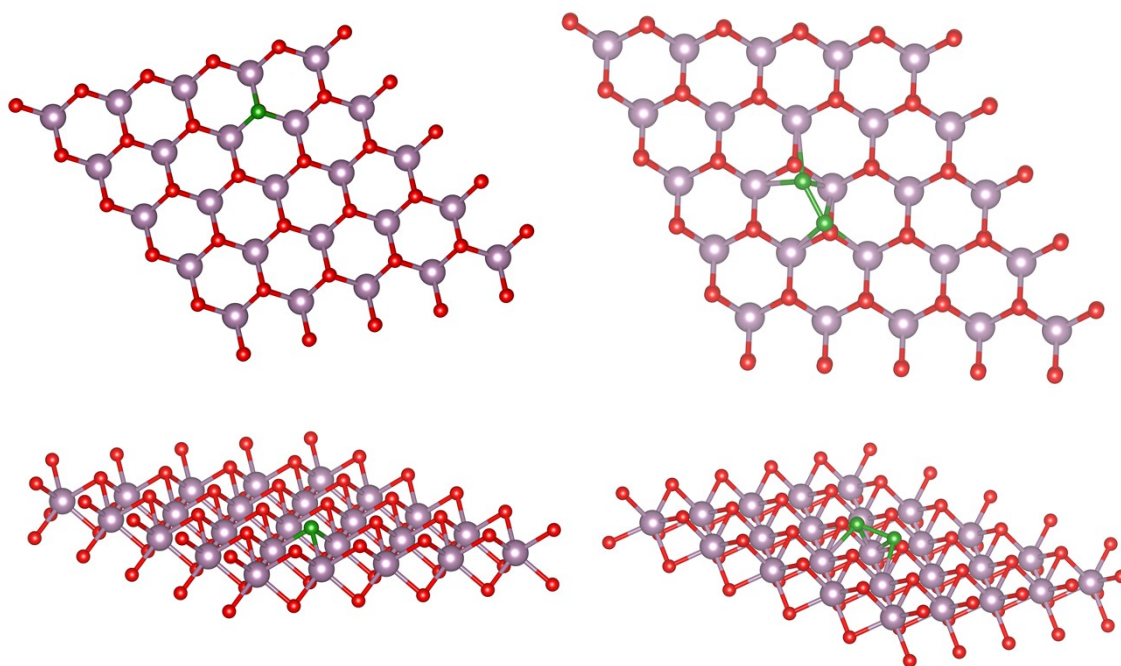

**Figure S1.** Double B monoatom doped MoO<sub>2</sub> configuration (B<sub>2</sub>/MoO<sub>2</sub>) (right) and B atom doped MoO<sub>2</sub> configuration (B/MoO<sub>2</sub>) (left).

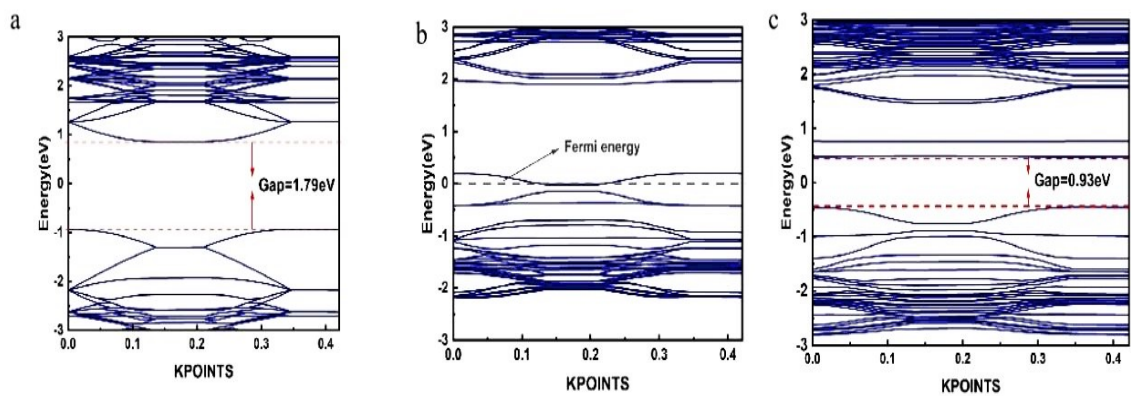

Figure S2. Energy band structure diagrams of a)  $\text{MoO}_2$ , b)  $\text{B/MoO}_2$  and c)  $\text{B}_2/\text{MoO}_2$ .

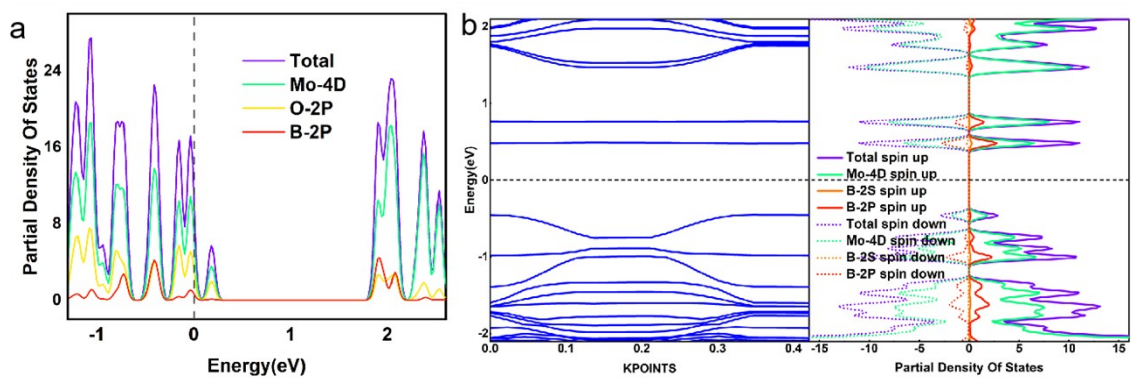

Figure S3. a) density of states plot of  $\text{B/MoO}_2$ ; b) projected density of states plot of  $\text{B}_2/\text{MoO}_2$ .

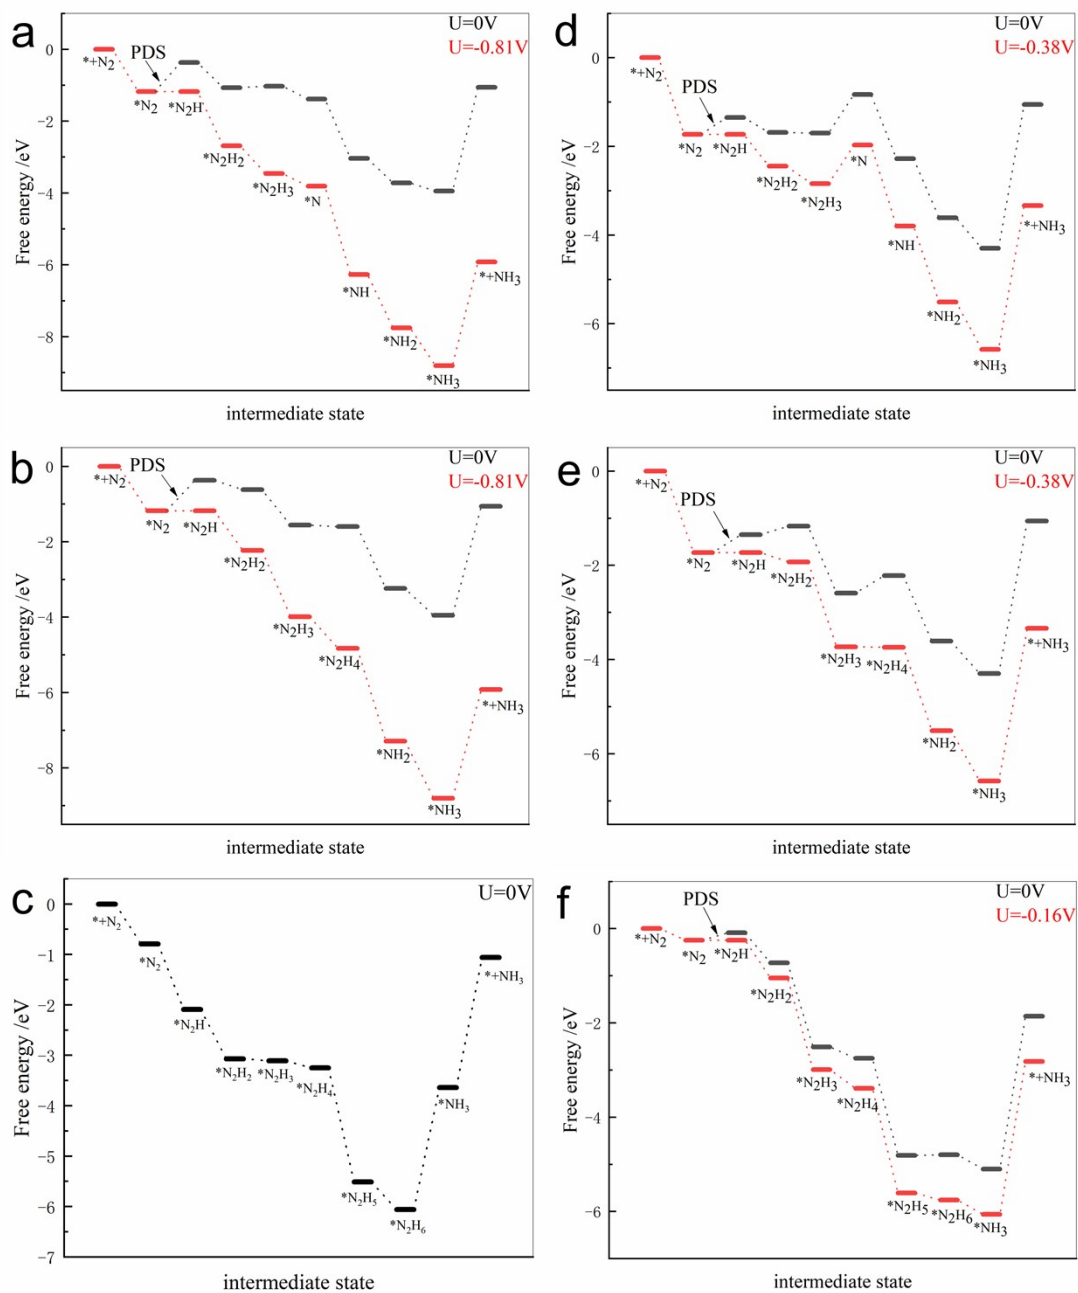

**Figure S4.** Free energy for the formation of various intermediates during the reduction of  $N_2$  to ammonia in the enzymatic (a), distal (b), and alternating (c) pathways on  $B_2/MoO_2$ , and in the enzymatic (d), distal (e), and alternating (f) pathways on  $B/MoO_2$ .

Table S1 bader charge analysis for different adsorption configurations

| adsorption configurations                 | sub     | B2     | N <sub>2</sub> |
|-------------------------------------------|---------|--------|----------------|
| N <sub>2</sub> -B <sub>2</sub> (side)     | -0.04 e | 0.01 e | 0.03 e         |
| N <sub>2</sub> -B <sub>2</sub> (terminal) | 0.16 e  | 0.09 e | -0.25 e        |
| N <sub>2</sub> -B (side)                  | 0.10 e  | 0.08 e | -0.19 e        |
| N <sub>2</sub> -B (terminal)              | 0.12 e  | 0.11 e | -0.22 e        |
